# Supplementary material for: Obesity Hinders the Protective Effect of Selenite Supplementation on Insulin Signaling
Source: MDPI journal article supplement (doi:10.3390/antiox11050862), 2022-04-28
Supplement: s1 [file s1]

***Obesity impedes the protective effect of selenite supplementation on insulin signaling.***

Robert Hauffe, Michaela Rath, Wilson Agyapong, Wenke Jonas, Heike Vogel, Tim J. Schulz, Maria Schwarz, Anna P. Kipp, Matthias Blüher, and André Kleinridders

**Supplementary Figures and Material**

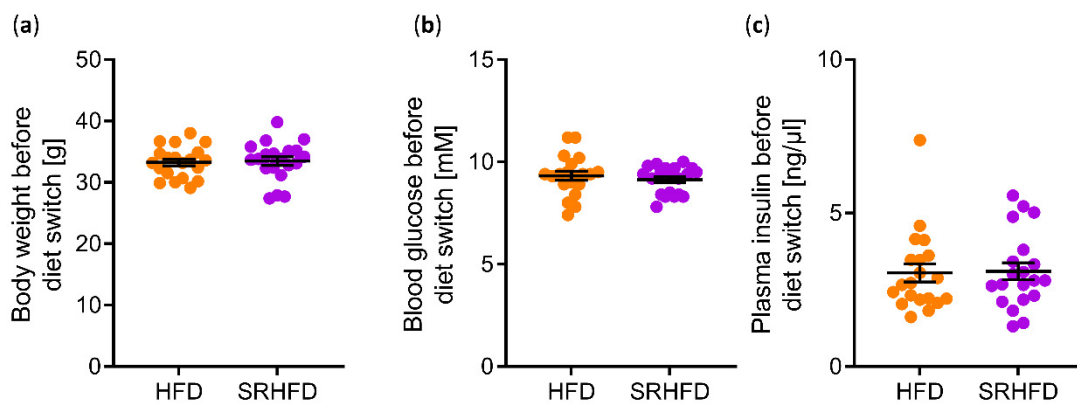

**Figure S1.** Characteristics of mice before SRHFD intervention. **(a)** Body weight of male C57Bl/6N mice fed HFD for 8 weeks. **(b)** Blood glucose levels of male C57Bl/6N mice fed HFD for 8 weeks. **(c)** Plasma insulin of male C57Bl/6N mice fed HFD for 8 weeks. All data are presented as mean  $\pm$  SEM.

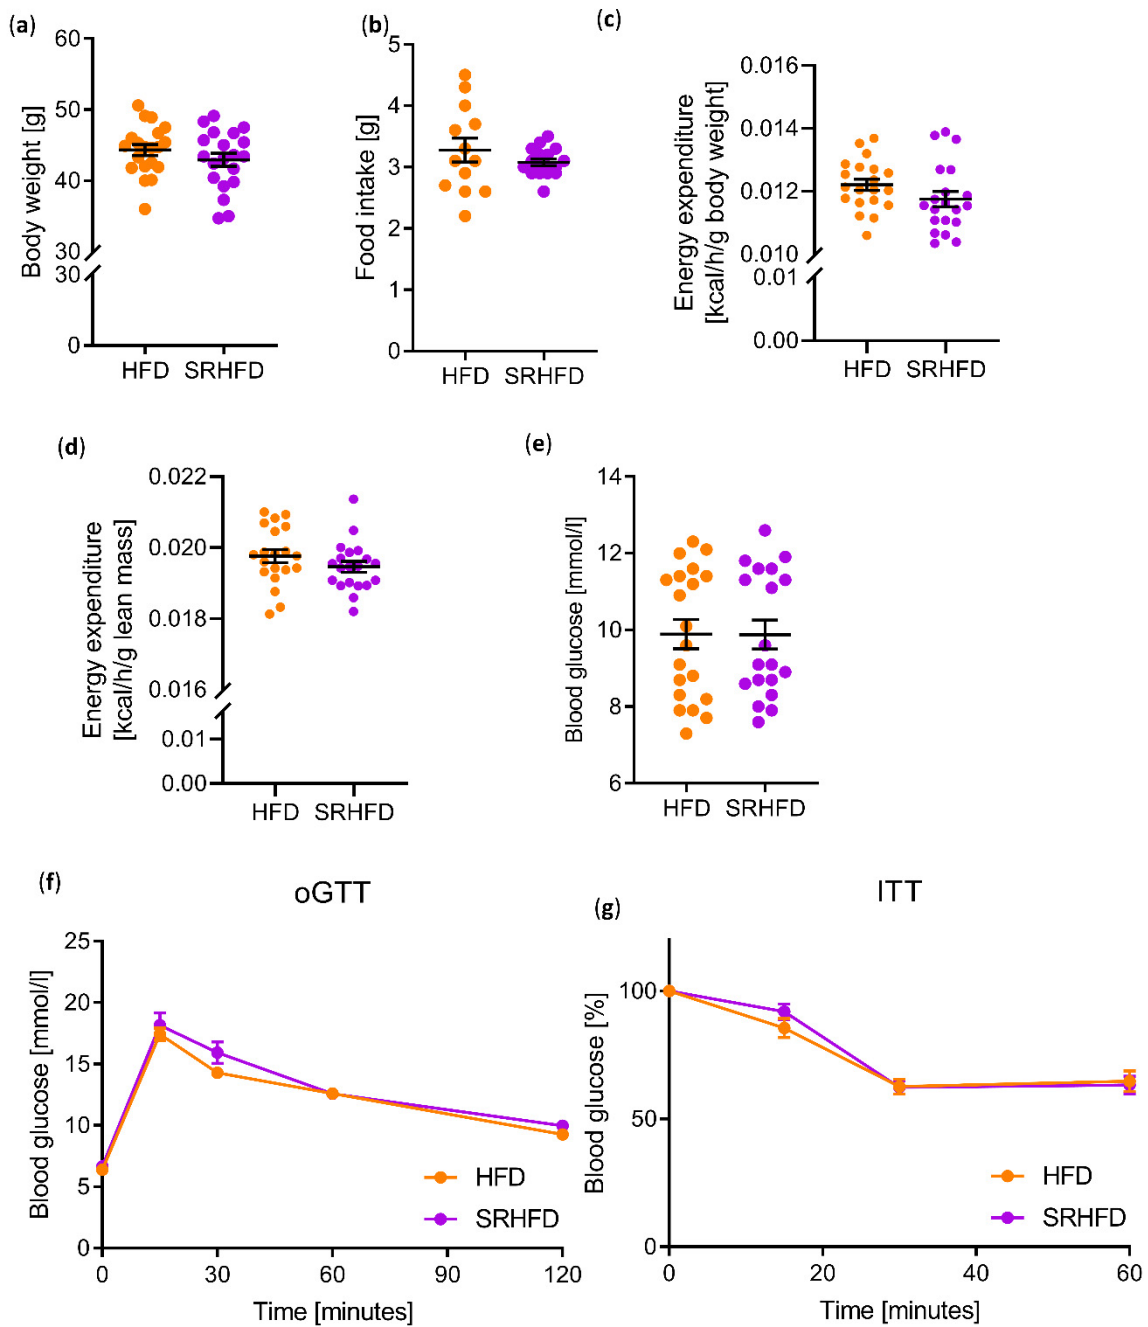

**Figure S2.** Selenite treatment in established obesity does not improve overall metabolic phenotype. **(a)** Final bodyweight of male C57Bl/6N mice fed either HFD or SRHFD for 10 weeks after established obesity. **(b)** Food intake of male C57Bl/6N mice fed either HFD or SRHFD for 9 weeks after established obesity. **(c, d)** Energy expenditure relative to body weight (c) or lean mass (d), respectively, of male C57Bl/6N mice fed either HFD or SRHFD for 9 weeks after established obesity. **(e)** Random fed blood glucose levels of male C57Bl/6N mice fed either HFD or SRHFD for 10 weeks after established obesity. **(f)** Blood glucose levels during an oGTT of male C57Bl/6N mice fed either HFD or SRHFD for 8 weeks after established obesity. **(g)** Blood glucose levels during an ITT of male C57Bl/6N mice fed either HFD or SRHFD for 6 weeks after established obesity. All data are presented as mean ± SEM.

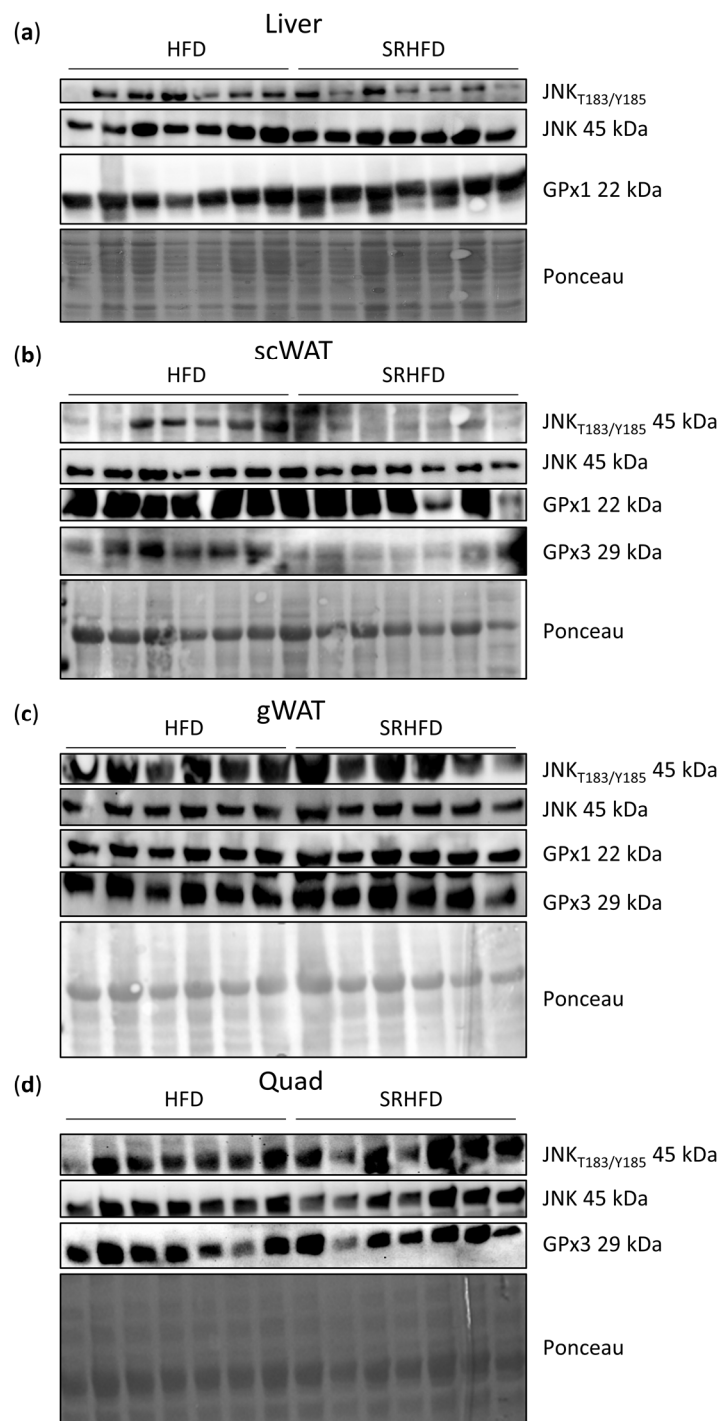

**Figure S3. (a-d)** Protein phosphorylation, expression and densitometric analysis of stress markers and selenoproteins in liver (a), gWAT (b), scWAT (c), and quadriceps (d) of male C57Bl/6N mice fed either HFD or SRHFD for 10 weeks after established obesity.

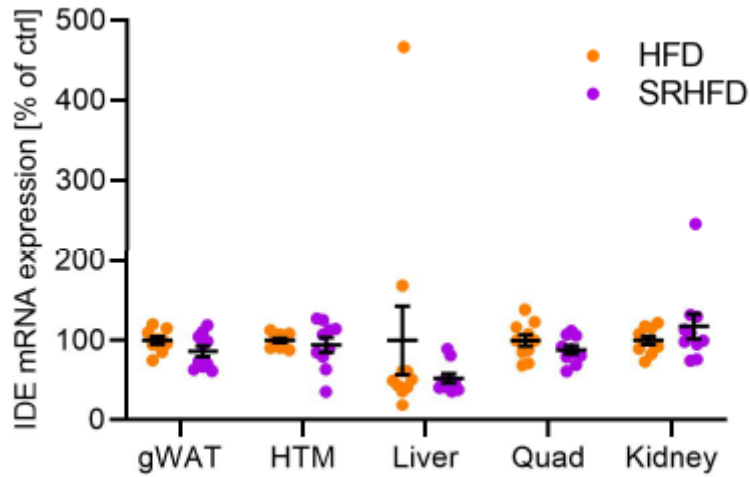

**Figure S4.** Tissue expression of insulin degrading enzyme (*Ide*) mRNA. Gene expression analyzed on tissues of male C57Bl/6N mice fed either HFD or SRHFD for 10 weeks after established obesity. All data are presented as mean  $\pm$  SEM.

**Table S1: Real-time quantitative PCR primer pairs**

| Target gene                                                      | Forward sequence        | Reverse sequence         |
|------------------------------------------------------------------|-------------------------|--------------------------|
| <i>Tbp</i> (TATA-binding-protein)                                | CTGGAATTGTACCGCAGCTT    | ATGATGACTGCAGCAAATCG     |
| <i>Pppary</i> (Peroxisome proliferator-activated receptor gamma) | CCCAGAGCATGGTGCCTTCGC   | AGTTGGTGGGCCAGAATGGCA    |
| <i>Ap2</i> (Adipocyte protein 2)                                 | AAGGTGAAGAGCATCATAACCCT | TCACGCCTTTCATAACACATTCC  |
| <i>Cebpa</i> (CCAAT/enhancer-binding protein alpha)              | CAAGAACAGCAACGAGTACCG   | GTCACTGGTCAACTCCAGCAC    |
| <i>Cebpb</i> (CCAAT/enhancer-binding protein beta)               | CAAGCTGAGCGACGAGTACA    | AGCTGCTCCACCTTCTTCTG     |
| <i>Glut4</i> (Glucose transporter type 4)                        | CATTCCCTGGTTCATTGTGG    | GAAGACGTAAGGACCCATAGC    |
| <i>Ir</i> (Insulin receptor)                                     | AATGGCAACATCACACACTACC  | AATGGCAACATCACACACTACC   |
| <i>Gpx1</i> (Glutathione peroxidase 1)                           | ACAGTCCACCGTGTATGCCTTC  | CTCTTCATTCTTGCCATTCTCCTG |
| <i>Gpx2</i> (Glutathione peroxidase 2)                           | GTGCTGATTGAGAATGTGGC    | AGGATGCTCGTTCTGCCCA      |
| <i>Gpx3</i> (Glutathione peroxidase 3)                           | CCATTTGGCTTGGTCATTCTGGG | CACCTGGTCGAACATACTTGAGAC |
| <i>Gpx4</i> (Glutathione peroxidase 4)                           | TCTGTGTAAATGGGGACGATGC  | TCTCTATCACCTGGGGCTCCTC   |
| <i>Gpx6</i> (Glutathione peroxidase 1)                           | GCACATCCTCTTTGTCAACG    | CTTCCAGGTTCTTGCTTTCC     |

|                                                                              |                          |                           |
|------------------------------------------------------------------------------|--------------------------|---------------------------|
| <i>Txnrd1</i><br>(Thioredoxin reductase 1)                                   | ATGAGAATGCTTACGGGAGGT    | GGAACCGCTCTGCTGAATAGAT    |
| <i>Txnrd2</i><br>(Thioredoxin reductase 2)                                   | GATCCGGTGGCCTAGCTTG      | TCGGGGAGAAGGTTCCACAT      |
| <i>Txnrd3</i><br>(Thioredoxin reductase 3)                                   | CGACAACGAACGTGTGGTGG     | AGTAGCTGCTTCGTGAGCCC      |
| <i>Dio1</i> (Iodothyronine deiodinase 1)                                     | AGAGACTCGTAGATGACTTTGCC  | GCCGGATGTCCACGTTGTT       |
| <i>Dio2</i> (Iodothyronine deiodinase 2)                                     | TTTGATGTGTCAGGAGTCGGG    | CCAACATTCCCTACCCCAAGA     |
| <i>Dio3</i> (Iodothyronine deiodinase 3)                                     | CACGGCCTTCATGCTCTGG      | CGGTTGTCGTCTGATACGCA      |
| <i>Sephs1</i><br>(Selenophosphate synthetase 1)                              | TGAACTGAAAGGCACAGGCTGC   | CGCAAGTATCCATCCCAATGC     |
| <i>Sephs2</i><br>(Selenophosphate synthetase 2)                              | ACCGACTTCTTTTACCCCTTGG   | TCACCTTCTCTCGTTCCTTTTCAC  |
| <i>Sep15</i> (15 kDa selenoprotein)                                          | GTTTCAAGCGGCGTCTGCTC     | TGCTTCTTCCTGACAGCACCC     |
| <i>SelenoH</i><br>(Selenoprotein H)                                          | CCTTATTCCACCAACGCGCCA    | GCGTCAGCTCGTACAATGCTC     |
| <i>SelenoK</i><br>(Selenoprotein K)                                          | ATGGAAGAGGGCCACCAGGA     | TTACCTTCCTCATCCACCAGCC    |
| <i>SelenoI</i><br>(Selenoprotein I)                                          | ACTGGTTACTGCTTCCTCTCCTC  | CTGCTTCACCACTTGTACGCC     |
| <i>SelenoM</i><br>(Selenoprotein M)                                          | CGGATTGGAACCGTCTTCGAG    | CACCTCCTTTAGGCGATTCAAC    |
| <i>SelenoO</i><br>(Selenoprotein O)                                          | TGACACTGAGTTCCAAAGGCAC   | GTTAGTGAAGTCAGCACCAGTCAG  |
| <i>SelenoP</i><br>(Selenoprotein P)                                          | CCTTGTTTTGCCTTACTCCTTCC  | TTTGTTGTGGTGTGGTGGTGG     |
| <i>SelenoS</i><br>(Selenoprotein S)                                          | CAGAAGATTGAAATGTGGGACAGC | CCTTTGGGGATGACAGATGAAGTAG |
| <i>SelenoT</i><br>(Selenoprotein T)                                          | CTTTAAATGATGTGCCAGTGTGGT | GGTAGGGCTATGATCGATGATGTG  |
| <i>SelenoV</i><br>(Selenoprotein V)                                          | CCCAACAGAATCTTGATCCGTG   | TTCAAACCTCCCCTGTAACCTG    |
| <i>SelenoW</i><br>(Selenoprotein W)                                          | GCCGTTTCGAGTCGTGTATTGT   | CACTTCAAAGAACCCGGTGAC     |
| <i>SelenoX</i><br>(Selenoprotein X)                                          | ACTTCGAGCCAGGTGTCTACG    | GGCACTTGGTCACACTGTCTG     |
| <i>F4/80</i> (EGF-like module-containing mucin-like hormone receptor-like 1) | GAATCTTGGCCAAGAAGAGAC    | GAATTCTCCTTGTATATCATCAGC  |
| <i>Tnfa</i> (Tumor necrosis factor alpha)                                    | CTTCTGTCTACTGAACTTCGGG   | CAGGCTTGTCACCTCGAATTTTG   |
| <i>Ccl2</i> (chemokine (C-C motif) ligand 2)                                 | GTCCCTGTCATGCTTCTGG      | GCTCTCCAGCCTACTCATTG      |
| <i>Il-4</i> (Interleukin 4)                                                  | ACAGGAGAAGGGACGCCAT      | GAAGCCCTACAGACGAGCTCA     |

**Table S2: Primary antibodies for Western Blotting**

| Antigen                          | Company                        | Cat.-Nº.  |
|----------------------------------|--------------------------------|-----------|
| 3-Nitrotyrosine (3-NT)           | Abcam plc.                     | ab110282  |
| $\beta$ -Actin                   | Santa Cruz                     | sc-47778  |
| AKT                              | Cell Signaling Technology, Inc | 9272      |
| AKT <sub>Ser473</sub>            | Cell Signaling Technology, Inc | 9271      |
| DNP (Carbonylation)              | Merck KGaA                     | D9656     |
| GPx1                             | Abcam plc.                     | ab22604   |
| GPx3                             | Thermo Fisher Scientific, Inc. | PA5-18677 |
| IR $\beta$                       | Cell Signaling Technology, Inc | 3025      |
| IR $\beta$ <sub>Y1150/1151</sub> | Santa Cruz                     | sc-81500  |
| IRS1                             | Cell Signaling                 | #2382     |
| IRS1 <sub>S307</sub>             | Cell Signaling                 | #2381     |
| JNK                              | Cell Signaling                 | #9252     |
| JNK <sub>T183/Y185</sub>         | Cell Signaling                 | #9251     |

**Table S3: Secondary antibodies for Western Blotting**

| Species | Company                        | Cat.-Nº.    |
|---------|--------------------------------|-------------|
| Rabbit  | Cell Signaling Technology, Inc | 7074S       |
| Mouse   | Cell Signaling Technology, Inc | 7076S       |
| Goat    | Jackson Immuno Research, Inc.  | 305-035-006 |
